# Supplementary material
Source: publisher figshare collection journal article supplement (https://tandf.figshare.com/ndownloader/files/13275281)
Supplement: Supplementary file 1 [file 13275281]

# Supplemental Online Material

## Complete list of the studied material. Abbreviations: Dn, dentary; Mx, maxilla; M1, M2, M3, first, second and third upper molar; m1, m2, m3, first, second and third lower molar.

**Sigmodontinaegen. et sp. indet.**685: right dn. with m1 (2); left dn. without teeth (1); right mx. without teeth (1); left mx. without teeth (1); 686: right mx. with M2–M3 (1); 687: right dn. without teeth (3); right mx. without teeth (1); left mx. without teeth (1); 691: left dn. without teeth (1); 709: left dn. without teeth (1); right mx. without teeth (1); left mx. without teeth (3); 710: right dn. without teeth (3); left dn. with m2–m3 (1); left dn. without teeth (1); right mx. without teeth (5); left mx. without teeth (7); 711: right dn. without teeth (2); left dn. without teeth (1); right mx. without teeth (5); left mx. without teeth (12); 712: right dn. without teeth (1); left dn. without teeth (1); right mx. without teeth (3); left mx. with M2 (1); 713: right dn. without teeth (2); left dn. without teeth (5); right mx. with M3 (1); right mx. without teeth (5); left mx. with M1–M3 (1); left mx. with M2 (1); left mx. without teeth (1); 714: right dn. with m2 (1); right dn. without teeth (2); left dn. without teeth (2); right mx. without teeth (3); left mx. with M2–M3 (1); left mx. with M2 (1); left mx. without teeth (4); 715: right dn. without teeth (3); left dn. without teeth (1); right mx. without teeth (6); left mx. with M3 (1); left mx. without teeth (2); 716: right dn. with m2 (1); right dn. without teeth (2); left dn. without teeth (1); right mx. with M3 (1); right mx. without teeth (2); left mx. with M1 and M3 (1); left mx. with M2 (1); left mx. without teeth (4).

***Delomys* sp.** 682-213: right dn. with m3 (1); palatal portion with right mx. with M1–M3 (1); 683-210: right dn. with m2 (1); palatal portion with right mx. with M1–M3 and left mx. with M1–M3 (1); 686-208: left mx. with M1–M2 (1); 687-211: left mx. with M2 (1) ; 710-212: right mx. with M1–M2 (1); palatal portion with right mx. with M2 and left mx. with M2 (1); 713-211: right mx. with M1–M2 (1); 714-212: left dn. with m1–m2 (1); right mx. with M1 (1); 715-201: right dn. with m1–m3 (1); palatal portion with right mx. with M1–M3 and left mx. with M1–M2 (1).

***Juliomys* sp.** 684-210: right mx. with M1–M2 (2); left mx. with M1 (1); 690-210: right dn. with m1 and m3 (1); 713-214: right mx. with M2 (1); 715-215: left mx. with M2 (1); 716-216: right dn. with m2–m3 (1).

***Akodon* cf *A*. *azarae*.** 656-200: right dn. with m1–m3 (1); 682-211: right dn. with m1–m2 (5); right dn. with m1 (3); right dn. with m2 (2); left dn. with m1–m2 (6); left dn. with m2–m3 (1); left dn. with m1 (2); right mx. with M1–M3 (2); right mx. with M1–M2 (3); right mx. with M2 (2); left mx. with M1–M3 (3); left mx. with M1–M2 (4); left mx. with M2–M3 (1); left mx. with M2 (1); 683-208: right dn. with m1–m2 (7); right dn. with m1 (1); left dn. with m1–m3 (1); left dn. with m1–m2 (4); left dn. with m2–m3 (1); left dn. with m1 (1); left dn. with m2 (1); right mx. with M1–M3 (1); right mx. with M2–M3 (1); left mx. with M1–M3 (2); left mx. with M1–M2 (1); 684-204: right dn. with m1–m3 (1); right dn. with m1–m2 (2); right dn. with m2 (1); left dn. with m1–m3 (1); left dn. with m1–m2 (1); left dn. with m1 (1); right mx. with M1–M2 (2); right mx. with M2 (2); 685-209: right dn. with m1–m2 (1); right dn. with m1 (1); right dn. with m2 (1); left dn. with m1–m3 (1); left dn. with m1–m2 (4); left dn. with m1 (2); left dn. with m2 (1); right mx. with M1–M3 (4); right mx. with M1–M2 (5); right mx. with M1 (1); right mx. with M2 (2); left mx. with M1–M3 (1); left mx. with M1–M2 (1); left mx. with M2–M3 (2); left mx. with M1 (1); 686-211: right dn. with m1–m3 (2); right dn. with m1–m2 (8); left dn. with m1–m2 (5); left dn. with m1 (2); left dn. with m2 (4); right mx. with M1–M2 (3); right mx. with M2–M3 (1); right mx. with M2 (2); left mx. with M1–M3 (1); left mx. with M1–M2 (2); left mx. with M1 (1); 687-209: right dn. with m1–m2 (3); right dn. with m1 (2); left dn. with m1–m2 (2); left dn. with m1 (4); left dn. with m2 (2); right mx. with M1–M3 (2); right mx. with M2–M3 (1); right mx. with M2 (1); left mx. with M1–M2 (4); left mx. with M1 (1); 688-207: right dn. with m1–m2 (3); right dn. with m2 (1); left dn. with m1 (1); left dn. with m2 (3); right mx. with M1–M3 (1); right mx. with M1–M2 (3); left mx. with M1–M3 (3); 689-211: right dn. with m1–m2 (1); left dn. with m1–m3 (1); left dn. with m1–m2 (3); left dn. with m1 (2); left dn. with m2 (1); right mx. with M1 (1); right mx. with M1 (1); 690-209: right dn. with m1–m2 (1); right dn. without teeth (1); left dn. with m1–m2 (1); left dn. with m2 (1); right mx. with M1–M2 (1); left mx. with M2–M3 (1); 691-209: right dn. with m1 (1); left dn. with m2 (1); right mx. with M1–M2 (1); right mx. with M1 (1); left mx. with M1–M2 (3); left mx. with M2–M3 (1); left mx. with M2 (1); 709-210: right dn. with m1–m2 (3); right dn. with m1 (3); left dn. with m1–m2 (3); left dn. with m1 (2); left dn. without teeth (1); right mx. with M1–M3 (1); right mx. with M1–M2 (2); right mx. with M2 (2); left mx. with M1–M3 (1); left mx. with M1–M2 (1); left mx. with M1 (1); left mx. with M2 (3); 710-208: right dn. with m1–m3 (1); left dn. with m1–m2 (3); right mx. with M1–M3 (1); right mx. with M1–M2 (1); right mx. with M2–M3 (1); right mx. with M2 (2); left mx. with M1–M3 (1); left mx. with M1 (1); left mx. with M2 (2); 711-207: right dn. with m1–m2 (1); left dn. with m1–m2 (2); right mx. with M1–M3 (2); right mx. with M2–M3 (1); right mx. with M1 (1); right mx. with M2 (3); left mx. with M1–M3 (1); left mx. with M1–M2 (1); left mx. with M2–M3 (2); left mx. with M1 (2); left mx. with M2 (2); 712-210: right dn. with m1–m2 (3); right dn. with m1 (1); left dn. with m1–m2 (6); left dn. with m1 (3); left dn. with m2 (1); right mx. with M1–M3 (3); right mx. with M1–M2 (5); right mx. with M2–M3 (2); right mx. with M2 (1); left mx. with M1–M2 (4); left mx. with M1 (1); left mx. with M2 (4); left mx. with M3 (1); 713-209: right dn. with m1–m2 (3); right dn. with m1 (3); right dn. with m2 (1); left dn. with m1–m3 (1); left dn. with m1–m2 (1); left dn. with m2–m3 (1); left dn. with m1 (1); right mx. with M1–M3 (7); right mx. with M1–M2 (4); right mx. with M2–M3 (1); right mx. with M1 (1); right mx. with M2 (2); left mx. with M1–M3 (2); left mx. with M1–M2 (2); left mx. with M2–M3 (1); left mx. with M2 (3); 714-211: right dn. with m1–m3 (1); right dn. with m1–m2 (2); left dn. with m1–m3 (1); left dn. with m1–m2 (2); left dn. with m1 (2); left dn. with m2 (1); right mx. with M1–M3 (3); right mx. with M1–M2 (2); right mx. with M1 (1); left mx. with M1–M3 (3); left mx. with M1–M2 (2); left mx. with M1 (1); left mx. with M3 (1); 715-212: right dn. with m1–m3 (1); right dn. with m1–m2 (9) ; right dn. with m1 (3); right dn. with m2 (2); left dn. with m1–m3 (3); left dn. with m1–m2 (2); left dn. with m2–m3 (1); left dn. with m1 (3); left dn. with m2 (1); right mx. with M1–M3 (4); right mx. with M1–M2 (6); right mx. with M2–M3 (2); right mx. with M1 (4); right mx. with M2 (3); left mx. with M1–M3 (4); left mx. with M1–M2 (6); left mx. with M2–M3 (2); left mx. with M2 (1); left mx. with M3 (1); 716-213: right dn. with m1–m3 (2); right dn. with m1–m2 (7); right dn. with m1 and m3 (2); right dn. with m1 (3); right dn. with m2 (2); left dn. with m1–m3 (1); left dn. with m1–m2 (3); left dn. with m1 (5); left dn. with m2 (2); right mx. with M1–M3 (9); right mx. with M1–M2 (4); right mx. with M2–M3 (2); right mx. with M1 (2); right mx. with M2 (3); left mx. with M1–M3 (3); left mx. with M1–M2 (9); left mx. with M2–M3 (3); left mx. with M1 (2); left mx. with M2 (5).

***Akodon* sp.** 658-201: left dn. with m1–m3 (1); 663-200: right dn. with com m1 (1); 682-210: right dn. with m1–m3 (2); right dn. with m1 (1); left dn. with m1 (4); left dn. with m3 (1); right mx. with M2–M3 (1); right mx. with M2 (1); left mx. with M1–M2 (3); left mx. with M2 (1); 683-207: right dn. with m1–m2 (1); right dn. with m1 (1); left dn. with m1–m2 (1); left dn. with m1 (3); right mx. with M1–M3 (1); right mx. with M1–M2 (1); 684-203: right dn. with m1 (2); left dn. with m1–m2 (1); right mx. with M2 (1); left mx. with M2 (1); 685-208: right dn. with m1 (1); left dn. with m1 (2); right mx. with M1–M3 (1); right mx. with M1–M2 (1); right mx. with M2–M3 (1); right mx. with M2 (1); left mx. with M2–M3 (1); left mx. with M2 (3); 686-210: left dn. with m1–m3 (1); left dn. with m1–m2 (2); left mx. with M1–M2 (1); left mx. with M1 e M3 (1); left mx. with M1 (1); left mx. with M2 (2); 687-208: right dn. with m1 (1); left dn. with m1–m2 (1); left dn. with m1 (1); right mx. with M2–M3 (2); right mx. with M1 (1); right mx. with M2 (2); left mx. with M1–M2 (1); left mx. with M2 (2); 688-206: right dn. with m1–m2 (1); left dn. with m1 (1); right mx. with M1–M2 (1); right mx. with M2 (1); 689-210: right dn. with m1–m2 (1); left dn. with m1–m2 (1); 690-208: right dn. with m1 (1); right dn. with m2 (1); left mx. with M2–M3 (1); left mx. with M2 (2); 691-208: left mx. with M2 (1); 709-208: right dn. with m1–m3 (1); right dn. with m1–m2 (1); right dn. with m1 (1); left dn. with m1–m2 (1); left dn. with m1 e m3 (1); right mx. with M1–M2 (3); right mx. with M2 (2); left mx. with M1 (1); 710-211: right dn. with (2); left dn. with m1–m3 (1); left dn. with m1–m2 (1); left dn. with m1 (1); right mx. with M1–M2 (1); left mx. with M2–M3 (1); 711-212: right dn. with m1 (1); right dn. with m2 (1); left dn. without teeth (1); right mx. with M1–M2 (1); right mx. with M1 (1); left mx. with M1–M2 (1); left mx. with M1 (1); 712-209: right dn. with m2 (1); left dn. with m1–m2 (1); left dn. with m1 and m3 (1); left dn. with m1 (1); left dn. with m2 (3); right mx. with M1–M3 (1); right mx. with M2 (2); left mx. with M1–M2 (1); left mx. with M1 (2); left mx. with M2 (3); 713-208: right dn. with m1–m3 (1); right dn. with m1 and m3 (1); left dn. with m1–m3 (1); left dn. with m1–m2 (1); left dn. with m1 (2); right mx. with M1–M3 (2); right mx. with M1 (2); right mx. with M2 (2); left mx. with M1–M3 (1); left mx. with M2 (2); 714-210: right dn. with m1–m2 (1); right dn. with m1 (2); left dn. with m1 (2); right mx. with M1 (2); left mx. with M1–M3 (1); left mx. with M1 e M3 (1); left mx. with M2 (1); 715-211: right dn. with m1–m2 (2); right dn. with m1 (1); left dn. with m2 (1); right mx. with M1–M2 (1); right mx. with M2 (3); left mx. with M1–M2 (1); left mx. with M2–M3 (1); left mx. with M1 (1); left mx. with M2 (4); 716-212: right dn. with m1–m3 (2); right dn. with m1–m2 (3); right dn. with m1 (3); right dn. with m2 (1); left dn. with m1–m3 (1); left dn. with m1–m2 (2); left dn. with m1 (5); right mx. with M1–M3 (2); right mx. with M2 (2); left mx. with M2 (5).

***Bibimys* sp.** 666-204: left dn. with m1–m2 (1); 667-201: left dn. with m1–m2 (1); 682-205: right dn. with m1–m3 (2); right dn. with m1–m2 (1); right dn. with m1 (2); right dn. with m2 (2); left dn. with m1–m3 (2); left dn. with m1–m2 (2); left dn. with m2 (1); right mx. with M1 (4); right mx. with M2 (2); right mx. with M1–M2 (2); left mx. with M2–M3 (1); left mx. with M1 (2); 683-204: right dn. with m1–m2 (2); right dn. with m2 (1); left dn. with m1–m2 (2); left dn. with m1 (1); right mx. with M1–M3 (1); right mx. with M1–M2 (1); left mx. with M1–M2 (1); 684-200: right dn. with m1–m2 (1); left dn. with m1–m2 (1); left dn. with m1 (1); right mx. with M1–M3 (1); left mx. with M1–M3 (1); 685-203: right dn. with m1–m2 (3); left dn. with m1–m2 (2); left dn. with m1 (1); left dn. with m2 (1); right mx. with M1–M3 (1); right mx. with M1–M2 (1); right mx. with M1 (1); right mx. with M2 (1); left mx. with M1–M3 (2); left mx. with M1–M2 (1); left mx. with M3 (1); 686-206: right dn. with m1–m3 (1); right dn. with m1–m2 (1); right dn. with m1 (3); right dn. without teeth (1); left dn. with m1 (1); right mx. with M1–M3 (3); right mx. with M1–M2 (1); left mx. with M1–M3 (1); left mx. with M1–M2 (1); left mx. without teeth (1); 687-201: right dn. with m1–m2 (1); right dn. with m1 (2); right dn. with m2 (1); right dn. without teeth (1); left dn. with m1–m2 (1); right mx. with M1–M3 (1); left mx. with M1–M2 (3); 688-202: right dn. with m1 (1); right dn. with m2 (2); left dn. with m1 (2); left dn. with m2 (1); right mx. with M2–M3 (1); right mx. with M1 (2); left mx. with M1 (3); 689-203: right dn. with m1–m2 (2); right dn. with m1 (4); left dn. with m1 (4); right mx. with M1–M3 (1); right mx. with M1–M2 (1); right mx. with M1 (2); left mx. with M1–M3 (1); left mx. with M1–M2 (1); 690-201: right dn. with m1–m2 (1); right dn. with m1 (3); left dn. with m1–m2 (1); left dn. with m1 (1); right mx. with M1–M2 (1); right mx. with M2–M3 (1); left mx. with M1–M3 (1); left mx. with M1 (1); 691-201: right dn. with m1–m3 (1); right dn. with m1 (4); right dn. without teeth (1); left dn. with m1–m2 (1); left dn. with m1 (2); left dn. without teeth (1); right mx. with M2–M3 (1); right mx. with M1 (4); left mx. with M1–M2 (2); left mx. with M1 (1); left mx. with M2 (1); 709-201: right dn. with m1–m2 (1); right dn. with m1 (1); left dn. with m1–m3 (1); left dn. with m1–m2 (1); left dn. with m1 and m3 (1); left mx. with M1–M2 (1); 710-205: right dn. with m1–m2 (1); left dn. with m2 (1); right mx. with M1–M3 (1); right mx. with M1–M2 (2); left mx. with M1–M2 (1); left mx. with M2 (1); 711-209: right dn. with m1–m2 (1); left dn. with m1–m2 (1); right mx. with M1–M2 (2); right mx. with M1 (2); right mx. with M2 (1); left mx. with M1 (1); 712-206: right dn. with m1–m2 (4); left dn. with m1–m2 (1); left dn. with m1 (2); right mx. with M1–M3 (1); right mx. with M1–M2 (3); left mx. with M1–M2 (2); left mx. with M1 (1); left mx. with M2 (1); left mx. with M3 (1); 713-203: right dn. with m1–m3 (1); right dn. with m1–m2 (5); right dn. with m1 (2); right dn. with m3 (1); left dn. with m1–m2 (4); left dn. with m1(1); right mx. with M1–M2 (1); left mx. with M1–M3 (1); left mx. with M1–M2 (2); 714-206: right dn. with m1–m3 (2); right dn. with m1–m2 (1); right dn. with m1 (1); right dn. with m2 (1); left dn. with m1–m3 (3); left dn. with m1–m2 (2); right mx. with M1–M2 (2); right mx. with M2 (2); left mx. with M1–M2 (2); left mx. with M1 (1); left mx. with M2 (1); 715-208: right dn. with m1–m3 (1); right dn. with m1–m2 (2); right dn. with m2 (1); left dn. with m1–m3 (1); left dn. with m1–m2 (3); left dn. with m1 (3); right mx. with M1–M3 (5); right mx. with M1 (1); right mx. with M2 (1); left mx. with M1–M3 (2); left mx. with M1–M2 (5); left mx. with M1 (1); 716-208: right dn. with m1–m2 (7); right dn. with m1 (4); right dn. with m2 (1); left dn. with m1–m2 (2); left dn. with m1–m2 (2); left dn. with m1 (5); left dn. with m2 (1); right mx. with M1–M3 (1); right mx. with M1–M2 (1); right mx. with M1 (1); right mx. with M2 (1); left mx. with M1–M3 (3); left mx. with M1–M2 (2); left mx. with M1 (3).

***Brucepattersonius* sp.** 709-209: left mx. with M1–M3 (1); left mx. with M1–M2 (1); 713-202: right mx. with M1–M3 (1); 715-203: right mx. with M1–M2 (1); 682-207: right mx. with M1–M3 (1); left mx. with M1–M2 (1); 683-209: left mx. with M1–M3 (1); left mx. with M2 (1); 686-204: right mx. without teeth (1); 687-207: right mx. with M1–M3 (1); 689-206: left mx. with M1–M2 (1).

***Deltamys* sp.** 682-212: right dn. with m1–m2 (2); right dn. with m1 and m3 (1); right dn. with m2–m3 (1); right dn. with m1 (1); right dn. with m2 (1); left dn. with m1–m2 (2); left dn. with m2 (1); right mx. with M1–M2 (3); 683-211: right dn. with m1 (2); right dn. with m2 (1); right dn. without teeth (1); right mx. with M1–M2 (2); right mx. with M2 (1); 684-211: right dn. with m1–m3 (1); right dn. with m1–m2 (1); 685-210: right dn. with m1–m2 (1); right dn. with m1 (1); right dn. with m2 (1); left dn. with m1–m2 (1); left dn. with m2–m3 (1); left dn. with m1 (2); right mx. with M1 (2); right mx. with M2 (2); left mx. with M1 (1); left mx. with M2 (1); 686-212: right dn. with m2 (1); left dn. with m1 (1); left dn. with m2 (1); right mx. with M1–M2 (1); 687-210: right dn. with m1–m2 (1); right dn. with m2 (1); left mx. with M2 (1); 688-210: right dn. with m1–m3 (1); right dn. with m2 (1); left dn. with m1–m2 (1); left mx. with M1–M2 (1); 689-213: right mx. with M1 (1); left mx. with M1–M2 (1); left mx. with M1 (1); 690-211: right dn. with m1–m2 (1); left dn. with m1–m2 (2); left dn. with m1 (1); left dn. with m2 (1); right mx. with M1–M2 (1); left mx. with M1–M2 (1); left mx. with M2 (1); 691-210: right dn. with m1–m2 (1); right dn. with m1 (2); 709-206: right dn. with m1–m2 (1); right dn. with m1–m2 (1); 710-214: right dn. with m1–m2 (1); right dn. with m2 (3); right dn. without teeth (1); left dn. with m1 (1); left dn. with m2 (1); right mx. with M1–M3 (1); right mx. with M1–M2 (1); 711-213: left dn. with m1–m2 (1); right mx. with M1–M3 (1); right mx. with M1 (1); 712-211: right dn. with m1–m2 (2); right dn. with m1 (3); left dn. with m1–m2 (1); left dn. with m1 (3); right mx. with M2–M3 (1); right mx. with M2 (2); 713-212: right dn. with m1–m2 (2); left dn. with m1–m2 (1); left dn. with m1 (1); left dn. with m2 (1); right mx. with M1–M3 (2); right mx. with M2 (1); left mx. with M1–M3 (1); left mx. with M1 (1); left mx. with M2 (1); 714-216: right dn. with m1–m2 (2); right dn. with m1 (5); right dn. with m2 (1); left dn. with m1–m2 (1); left dn. with m2 (1); left mx. with M1–M2 (1); left mx. with M2 (1); 715-214: right dn. with m1–m2 (1); right dn. with m1 (1); right dn. with m2 (2); left dn. with m1–m2 (1); left dn. with m2 (2); right mx. with M1–M2 (1); right mx. with M1 (2); left mx. with M1–M2 (5); 716-214: right dn. with m1–m2 (2); right dn. with m1 (1); right dn. with m2 (3); left dn. with m1–m2 (1); left dn. with m2 (2); right mx. with M1–M2 (2); right mx. with M1 (2); right mx. with M2 (1); left mx. with M1–M2 (3); left mx. with M1 (2); left mx. with M2 (2).

***Gyldenstolpia* cf *G*. *planaltensis*.** 657-200: left dn. without teeth (1); right mx. with M1–M3 (1); 658-200: left dn. with m1–m3 (1); 658-204: left dn. with m1 (1); 660-200: left dn. with m1–m3 (1); left dn. without teeth (1); 663-201: left dn. with m1 (1); 665-200: right dn. with m1–m3 (1); 668-200: right dn. with m1–m3 (1); left mx. with M2–M3 (1); 714-200: right dn. with m1–m3 (1); 716-200: left dn. with m1–m3 (1); left mx. with M3 (1); 689-201: left dn. with m1–m3 (1).

***Kunsia tomentosus*.** 666-201: left dn. with m1 (1).

***Necromys lasiurus*.** 656-202: right dn. with m1 (1); 658-203: right mx. with M1 (1); 663-202: right dn. with m1–m3 (1); 666-203: left dn. with m1–m2 (1); 682-203: right dn. with m1–m2 (1); right dn. with m1 (3); right dn. with m2 (1); left dn. with m2–m3 (1); left dn. with m1 (3); right mx. with M1–M3 (2); right mx. with M1–M2 (4); right mx. with M1 (1); right mx. with M2 (1); left mx. with M1–M2 (3); left mx. with M1 (1); left mx. with M2 (2); 683-203: right dn. with m1–m3 (1); right dn. with m1 (2); right dn. with m2 (1); left dn. with m1–m3 (2); left dn. with m1–m2 (2); right mx. with M1–M2 (2); right mx. with M1 and M3 (1); right mx. with M1 (1); left mx. with M1 (2); left mx. with M2 (1); 684-207: right mx. with M1 (1); left mx. with M1–M3 (1); left mx. with M2 (1); 685-207: right dn. with m1 (1); right dn. with m3 (1); left dn. with m1 (1); left dn. with m2 (1); right mx. with M1 (2); right mx. with M2 (1); left mx. with M1–M2 (7); left mx. with M1 (2); 686-209: right dn. with m1 and m3 (1); right dn. with m1 (4); left dn. with m1–m2 (1); left dn. with m1 (5); right mx. with M1–M3 (1); right mx. with M1–M2 (2); left mx. with M1–M2 (2); left mx. with M1 (1); 687-205: right dn. with m1–m2 (2); right dn. with m1 (3); left dn. with m1–m3 (1); right mx. with M1–M2 (2); left mx. with M1–M2 (1); 688-205: right dn. with m1 (1); left dn. with m1–m2 (1); left dn. with m1 (2); left mx. with M2–M3 (1); 689-209: right dn. with m1 (1); right dn. with m2 (1); left dn. with m1 (1); right mx. with M1–M2 (1); left mx. with M1 (1); 690-207: right dn. with m1–m2 (1); right dn. with m1 (2); left dn. with m2 (1); right mx. with M1–M2 (1); left mx. with M1 (1); 691-207: right dn. with m2 (2); left dn. with m2 (1); right mx. with M1 (3); right mx. with M2 (1); left mx. with M1–M2 (3); left mx. with M1 (1); 709-205: right dn. with m1–m3 (2); right dn. with m1–m2 (1); right dn. with m1 (1); right dn. without teeth (1); left dn. with m1–m2 (1); left dn. with m1 (1); left dn. with m2 (2); left dn. without teeth (2); right mx. with M1–M2 (1); left mx. with M1–M3 (1); left mx. with M1–M2 (3); left mx. with M1 (1); left mx. with M2 (1); 710-203: right dn. with m1 (3); right dn. with m2 (1); left dn. with m1–m2 (2); left dn. with m1 (1); right mx. with M1–M2 (1); right mx. with M2 (1); left mx. with M1–M2 (1); 711-204: right dn. with m1–m2 (2); right dn. with m1 (3); right dn. without teeth (1); left dn. with m1 (1); right mx. with M1–M2 (1); left mx. with M1–M2 (1); left mx. with M1 (1); 712-204: right dn. with m1–m3 (1); right dn. with m1 and m3 (1); right dn. with m1 (2); left dn. with m1–m3 (2); left dn. with m1–m2 (1); left dn. with m1 (3); right mx. with M1–M2 (1); right mx. with M2–M3 (1); right mx. with M1 (2); right mx. with M2 (1); right mx. with M3 (1); left mx. with M1–M3 (2); left mx. with M1–M2 (3); left mx. with M2 (2); 713-207: right dn. with m1 (3); left dn. with m1 (2); left dn. with m2 (1); left dn. without teeth (1); right mx. with M1–M2 (3); right mx. with M1 (4); left mx. with M1–M2 (3); left mx. with M1 (1); 714-204: right dn. with m1 (4); right dn. with m2 (2); left dn. with m1–m3 (1); left dn. with m1–m2 (2); right mx. with M2–M3 (2); right mx. with M1 (2); right mx. with M2 (1); left mx. with M1–M3 (1); left mx. with M1–M2 (2); left mx. with M1 (2); left mx. with M2 (1); 715-210: right dn. with m1–m2 (1); right dn. with m1 (1); right dn. without teeth m1–m3 (1); left dn. with m1–m3 (1); left dn. with m1 and m3 (1); left dn. with m1 (1); left dn. with m2 (2); right mx. with M1–M3 (1); right mx. with M1–M2 (3); right mx. with M1 and M3 (1); right mx. with M1 (2); right mx. with M2 (3); left mx. with M1–M3 (2); left mx. with M1–M2 (3); left mx. with M2–M3 (1); left mx. with M1 (6); 716-210: right dn. with m1–m3 (1); right dn. with m1–m2 (2); right dn. with m1 (6); right dn. with m2 (2); left dn. with m1–m2 (4); left dn. with m1 (2); right mx. with M1–M3 (1); right mx. with M1–M2 (7); right mx. with M2–M3 (1); right mx. with M1 (1); right mx. with M2 (1); left mx. with M1–M3 (2); left mx. with M1–M2 (5); left mx. with M1 and M3 (1); left mx. with M2–M3 (1); left mx. with M1 (5); left mx. with M2 (1).

***Necromys* *obscurus*.** 663-200: right dn. with m1–m2 (1); 682-202: right dn. with m1–m2 (2); right mx. with M2–M3 (1); left mx. with M1 (1); 683-202: right dn. with m1–m2 (1); right dn. with m2–m3 (1); left dn. with m1 (1); left mx. with M1–M2 (1); 684-201: left dn. with m1–m3 (1); 685-206: right dn. with m1 (1); left dn. with m1 (1); left mx. with M1–M3 (1); left mx. with M2 (1); 687-204: left dn. with m1–m3 (1); right mx. with M1–M2 (1); left mx. with M1 (1); 688-204: left mx. with M1–M2 (1); left mx. with M1 (1); 689-208: right dn. with m2 (1); left mx. with M1–M3 (1); 690-206: left dn. with m1 (1); 691-206: right dn. with m1 (1); left dn. with m1 (1); right mx. with M1 (1); 709-204: right dn. with m1–m2 (3); left dn. with m1 (1); left dn. with m2 (1); right mx. with M1–M2 (2); right mx. with M1 (1); left mx. with M1–M2 (1); left mx. with M1 (1); 710-212: left dn. with m1 (1); right mx. with M1 (1); 711-203: right dn. with m1–m2 (1); left dn. with m2–m3 (1); right mx. with M1–M2 (1); left mx. with M1 (1); 712-203: right dn. with m1–m2 (1); left dn. with m1 (2); right mx. with M1–M2 (1); left mx. with M1–M2 (1); left mx. with M1 (1); 713-206: right dn. with m1–m2 (1); right dn. with m1 (1); right dn. with m2 (2); left dn. with m1 (2); left dn. with m2 (1); left mx. with M1–M2 (1); 714-203: left dn. with m1–m2 (1); left dn. with m1 (2); right mx. with M1–M3 (1); left mx. with M1–M2 (1); left mx. with M2 (2); 715-209: right dn. with m1–m3 (1); right dn. with m1–m2 (2); right dn. with m1 and m3 (1); right dn. with m1 (1); right mx. with M1–M2 (1); left mx. with M1–M2 (2); left mx. with M2 (1); 716-209: right dn. with m1–m2 (1); right dn. with m1 (1); right dn. with m2 (2); right dn. with m3 (1); left dn. with m1–m3 (1); left dn. with m1–m2 (2); left dn. with m2 (3); left dn. without teeth (1); right mx. with M1–M3 (1); right mx. with M1–M2 (1); right mx. with M1 (1); left mx. with M1–M3 (1).

***Oxymycterus* sp.** 662-200: right dn. with m1–m2 (1); 665-201: left dn. with m1–m2 (1); 682-204: right dn. with m1–m3 (1); right dn. with m1 (2); right dn. with m2 (1); left dn. with m1–m3 (2); left dn. with m1–m2 (1); left dn. with m1 (1); right mx. with M1–M3 (1); right mx. with M1–M2 (1); left mx. with M1–M3 (1); left mx. with M1–M2 (5); left mx. with M2–M3 (1); 683-201: left dn. with m1–m2 (1); left dn. with m1 (3); left mx. with M1–M2 (1); left mx. with M1 (1); 684-209: left mx. with M1–M3 (1); 685-201: right dn. with m1–m2 (1); left dn. with m1 (1); right mx. with M1–M2 (1); left mx. with M3 (1); 686-203: right dn. with m1 (1); right dn. with m2 (1); left dn. with m1–m2 (1); left dn. with m2 (2); right mx. with M1–M3 (1); right mx. with M1–M2 (1); right mx. with M1 (1); right mx. with M2 (1); left mx. with M1–M2 (1); left mx. with M1 (1); 687-206: left dn. with m1–m2 (1); left dn. with m1 (1); left dn. with m2 (1); right mx. with M1–M2 (1); right mx. with M1 (1); 688-209: left mx. without teeth (1); 689-205: left dn. with m1–m2 (1); left dn. with m2 (1); 690-203: right dn. without teeth (1); left dn. with m1–m2 (1); left dn. with m2–m3 (1); right mx. with M1 (1); 691-202: right dn. with m2 (1); right dn. with m3 (1); right dn. without teeth (1); left dn. with m1 (1); 709-203: right dn. with m1–m2 (1); right dn. with m2 (1); left dn. with m1 (1); 710-201: right dn. with m1–m2 (1); right dn. without teeth (1); left mx. with M1 (1); 711-201: right dn. with m1–m3 (1); right dn. with m1–m2 (1); right dn. without teeth (1); left dn. with m1 (1); left dn. without teeth (1); 712-202: right dn. with m1–m3 (3); right dn. with m1–m2 (2); right dn. with m1 (2); right dn. with m2 (1); left dn. with m1–m3 (1); left dn. with m1–m2 (3); left dn. with m1 (1); left dn. with m2 (1); right mx. with M1–M3 (1); right mx. with M1–M2 (1); right mx. with M1 (1); left mx. with M1 (2); 713-201: right dn. with m1 and m3 (1); right dn. with m1 (1); right dn. with m3 (1); left dn. with m1 (2); left dn. with m2 (1); right mx. with M1–M3 (1); right mx. with M1 (2); left mx. with M1–M2 (1); 714-202: right dn. with m1–m2 (1); right dn. with m2 (1); right dn. without teeth (1); left dn. with m1 (2); left dn. with m2 (1); right mx. with M1–M2 (1); right mx. with M2 (1); left mx. with M1 (1); 715-202: right dn. with m1–m3 (1); right dn. with m2–m3 (1); right dn. with m1 (3); right dn. with m2 (1); left dn. with m1–m2 (1); left dn. with m2–m3 (1); left dn. with m1 (2); left dn. without teeth (1); right mx. with M1 (4); right mx. with M1–M2 (1); left mx. with M1 (1); 716-203: right dn. with m1–m3 (1); right dn. with m1–m2 (1); right dn. with m1 (4); right dn. without teeth (1); left dn. with m1 (2); left dn. with m2 (1); right mx. with M1–M2 (4); right mx. with M2 (1); left mx. with M1–M2 (1); left mx. with M2–M3 (1); left mx. with M1 (1).

***Scapteromys* *tumidus*.** 714-215: left mx. with M1–M2 (1); 685-213: left mx. with M2–M3 (1).

***Holochilus* sp.** 667-41: right dn. with m1–m3 (1); 682-200: right dn. with m1–m2 (1); right dn. without teeth (1); 685-211: left mx. with M3 (1); 686-201: left dn. with m2–m3 (1); 689-202: right mx. with M2 (1); left mx. with M2 (1); 691-204: right mx. with M3 (1); 711-202: right dn. with m1–m3 (1); right dn. with m2 (1); right mx. with M1 (1); 712-200: left dn. with m1–m3 (1); left dn. with m2 (1); 714-205: left dn. with m2 (1); 715-200: right mx. with M1–M3 (1); 716-201: right dn. with m1–m3 (1); right dn. without teeth (1); left dn. with m2 (1).

***Nectomys* *squamipes*.** 683-213: right dn. with m1 (1).

***Oecomys catherinae*.** 713-213: right dn. with m1–m2 (1); 716-211: left dn. with m2 (1).

***Oligoryzomys* sp.** 682-209: right dn. with m1–m2 (1); right dn. with m1 and m3 (1); right dn. with m1 (2); right dn. with m2 (2); right dn. with m3 (1); right dn. without teeth (1); left dn. with m1–m3 (2); left dn. with m1–m2 (1); left dn. with m2–m3 (1); left dn. with m1 (1); right mx. with M1–M3 (4); right mx. with M1–M2 (3); right mx. with M2–M3 (2); right mx. with M2 (4); left mx. with M1–M3 (2); left mx. with M1–M2 (3); left mx. with M2 (5); left mx. with M3 (1); 683-206: right dn. with m1–m2 (2); right dn. with m2–m3 (1); right dn. with m1 (1); right dn. with m2 (1); right dn. with m3 (1); left dn. with m2–m3 (1); left dn. with m1 (1); right mx. with M1–M3 (1); right mx. with M1–M2 (2); right mx. with M2 (1); left mx. with M1–M3 (4); left mx. with M1–M2 (1); left mx. with M2–M3 (2); 684-206: right dn. with m1–m2 (1); right dn. with m1 (3); left dn. with mw (1); right mx. with M1–M3 (2); right mx. with M1–M2 (1); right mx. with M2 (3); left mx. with M1–M3 (1); left mx. with M1–M2 (3); left mx. with M2–M3 (2); left mx. with M1 (2); left mx. with M2 (1); 685-205: right dn. with m1–m3 (1); right dn. with m1–m2 (2); right dn. with m1 and m3 (2); right dn. with m1 (3); right dn. with m2 (2); left dn. with m1–m3 (1); left dn. with m3 (1); left dn. without teeth (1); right mx. with M1–M3 (2); right mx. with M1–M2 (2); right mx. with M2–M3 (2); right mx. with M1 (3); right mx. with M2 (4); left mx. with M1–M2 (4); left mx. with M2–M3 (5); left mx. with M2 (4); 686-207: right dn. with m1–m3 (2); right dn. with m1–m2 (1); right dn. with m1 and m3 (1); right dn. with m1 (3); right dn. with m2 (2); right dn. with m3 (3); left dn. with m1–m2 (1); left dn. with m1 (6); left dn. with m2 (2); right mx. with M1–M3 (4); right mx. with M1–M2 (2); right mx. with M2 (3); right mx. with M3 (1); left mx. with M1–M2 (1); left mx. with M2–M3 (1); left mx. with M1 (1); left mx. with M2 (3); 687-203: right dn. with m1–m3 (1); right dn. with m1–m2 (1); right dn. with m1 and m3 (1); right dn. with m1 (2); right dn. with m2 (1); right dn. without teeth (1); left dn. without teeth (1); right mx. with M1–M3 (1); right mx. with M1–M2 (1); right mx. with M2 (3); left mx. with M1–M3 (1); left mx. with M1–M2 (1); left mx. with M1 (1); left mx. with M2 (4); 688-208: right dn. with m1–m3 (1); right dn. with m2–m3 (1); right dn. with m1 (1); right dn. with m2 (1); left dn. with m1 (1); right mx. with M1–M2 (1); right mx. with M2 (3); left mx. with M1–M2 (2); left mx. with M2–M3 (1); 689-207: right dn. with m1–m2 (1); right dn. with m2–m3 (1); right dn. with m1 (2); right dn. with m2 (1); left dn. with m1–m3 (1); left dn. without teeth (2); right mx. with M1–M2 (1); right mx. with M2 (4); left mx. with M1–M3 (2); left mx. with M1 (1); left mx. with M2 (1); 690-205: right dn. with m1 and m3 (1); right dn. with m1 (1); left dn. with m1 (1); left dn. with m3 (1); right mx. with M1–M3 (1); right mx. with M2–M3 (1); right mx. with M2 (3); left mx. with M2–M3 (1); 691-205: right dn. with m1 (1); left dn. with m2–m3 (1); left dn. with m1 (3); left dn. with m3 (1); left dn. without teeth m1 (1); right mx. with M1–M3 (1); right mx. with M1–M2 (1); right mx. with M1 (1); left mx. with M1–M3 (1); 709-202: right dn. with m1–m3 (1); right dn. with m1–m2 (1); right dn. with m1 and m3 (1); right dn. with m1 (1); right dn. with m2 (1); left dn. with m1–m3 (1); left dn. with m1–m2 (1); left dn. with m1 and m3 (1); left dn. with m1 (1); left dn. without teeth (3); right mx. with M1–M3 (1); right mx. with M1–M2 (3); right mx. with M2 (1); left mx. with M1–M3 (1); left mx. with M1 (1); left mx. with M2 (1); 710-206: right dn. with m2–m3 (1); right dn. with m1 (3); right dn. with m3 (1); right dn. without teeth (1); left dn. with m1–m2 (1); left dn. with m2–m3 (1); left dn. with m1 (1); left dn. with m3 (1); right mx. with M2–M3 (2); right mx. with M1 (2); right mx. with M2 (2); right mx. with M3 (1); left mx. with M1–M2 (2); left mx. with M1 (1); left mx. with M2 (4); 711-205: right dn. with m2–m3 (1); right dn. with m3 (1); right dn. without teeth (3); left dn. with m2 (1); left dn. without teeth (4); right mx. with M1–M3 (1); right mx. with M2–M3 (3); right mx. with M1 (2); right mx. with M2 (4); left mx. with M1–M3 (2); left mx. with M1–M2 (2); left mx. with M2–M3 (3); left mx. with M1 (1); left mx. with M2 (6); 712-207: right dn. with m1–m3 (1); right dn. with m1–m2 (2); right dn. with m1 (2); right dn. with m3 (1); right dn. without teeth (3); left dn. with m1 and m3 (1); left dn. with m2–m3 (1); left dn. with m2 (2); left dn. with m3 (3); right mx. with M1–M3 (4); right mx. with M1–M2 (2); right mx. with M2–M3 (3); right mx. with M1 (5); right mx. with M2 (5); right mx. with M3 (1); left mx. with M1 and M3 (1); left mx. with M2–M3 (4); left mx. with M1 (2); left mx. with M2 (11); 713-204: right dn. with m1–m3 (1); right dn. with m1–m2 (1); right dn. with m1 and m3 (1); right dn. with m2–m3 (1); right dn. with m1 (1); right dn. with m2 (1); right dn. with m3 (2); left dn. with m1–m3 (1); left dn. with m2–m3 (1); left dn. with m1 (1); left dn. without teeth (1); right mx. with M1–M3 (1); right mx. with M1–M2 (4); right mx. with M2–M3 (3); right mx. with M1 (1); right mx. with M2 (1); left mx. with M1–M2 (6); left mx. with M2–M3 (4); left mx. with M2 (4); 714-207: right dn. with m1–m3 (1); right dn. with m1–m2 (1); right dn. with m1 and m3 (2); right dn. with m1 (1); right dn. with m2 (1); left dn. with m1 and m3 (1); right mx. with M1–M3 (4); right mx. with M1–M2 (4); right mx. with M2–M3 (1); right mx. with M1 (1); right mx. with M2 (8); left mx. with M1–M3 (3); left mx. with M1–M2 (2); left mx. with M2–M3 (2); left mx. with M1 (2); left mx. with M2 (5); left mx. with M3 (2); 715-205: right dn. with m2–m3 (1); right dn. with m1 (3); right dn. with m2 (4); right dn. with m3 (3); right dn. without teeth (1); left dn. with m1–m2 (1); left dn. with m1 and m3 (4); left dn. with m1 (6); left dn. with m2 (5); left dn. with m3 (1); left dn. without teeth (1); right mx. with M1–M3 (3); right mx. with M1–M2 (2); right mx. with M2–M3 (2); right mx. with M1 (2); right mx. with M2 (9); left mx. with M1–M3 (2); left mx. with M1–M2 (2); left mx. with M1 and M3 (1); left mx. with M2–M3 (3); left mx. with M1 (1); left mx. with M2 (11); 716-207: right dn. with m1–m3 (2); right dn. with m1 and m3 (1); right dn. with m2–m3 (2); right dn. with m1 (3); right dn. with m2 (2); right dn. with m3 (1); right dn. without teeth (5); left dn. with m1–m2 (1); left dn. with m2–m3 (1); left dn. with m1 (5); left dn. with m2 (4); left dn. with m3 (2); left dn. without teeth (2); right mx. with M1–M3 (3); right mx. with M1–M2 (5); right mx. with M2–M3 (6); right mx. with M1 (2); right mx. with M2 (7); left mx. with M1–M3 (2); left mx. with M1–M2 (9); left mx. with M2–M3 (5); left mx. with M1 (3); left mx. with M2 (3).

***Pseudoryzomys simplex*.** 658-200: left mx. with M1–M3 (1); 659-200: right dn. with m1–m3 (1); 660-201: left mx. with M3 (1); 664-201: right dn. with m1–m2 (1); 666-200: left dn. with m2–m3 (1); 667-200: right dn. with m1 (1); 682-201: right dn. with m2–m3 (2); right dn. with m1 (1); right dn. with m2 (1); left dn. with m1–m3 (1); left dn. with m1 (1); left dn. without teeth (2); right mx. with M1–M3 (1); right mx. with M1–M2 (1); right mx. with M1 (2); right mx. with M2 (1); right mx. with M3 (1); left mx. with M1–M3 (1); left mx. with M1–M2 (2); left mx. with M2–M3 (1); left mx. with M1 (1); left mx. with M3 (3); 683-200: right dn. with m1–m3 (1); right dn. with m2–m3 (1); right dn. with m2 (1); left dn. with m2 (1); right mx. with M2–M3 (2); right mx. with M1 (1); right mx. with M2 (1); left mx. with M2–M3 (2); 684-208: right mx. with M1–M3 (1); left mx. with M3 (1); 685-200: left dn. with m3 (1); right mx. with M2–M3 (1); 686-200: right dn. with m2–m3 (1); right dn. with m2 (1); left dn. with m2 (1); left dn. with m3 (2); left dn. without teeth (1); right mx. with M3 (1); left mx. with M2–M3 (1); left mx. with M1 (1); left mx. with M3 (1); 687-200: right dn. with m2–m3 (1); left dn. with m1–m2 (1); left dn. with m1 (1); left dn. with m3 (2); left dn. without teeth (1); right mx. with M1–M3 (1); right mx. with M2–M3 (1); right mx. with M2 (1); left mx. with M2–M3 (2); left mx. with M1 (1); left mx. with M1 (1); left mx. with M2 (1); 688-200: right mx. with M1–M3 (1); 689-200: left dn. with m2–m3 (1); right mx. with M2–M3 (1); 690-200: right dn. with m3 (1); left dn. with m2 (1); left mx. with M1–M3 (1); left mx. with M2–M3 (1); 691-200: right dn. with m3 (1); left dn. with m1 (1); right mx. with M1–M3 (1); right mx. with M1 (1); right mx. with M2 (1); left mx. with M1–M2 (1); left mx. with M2 (2); 709-200: right dn. with m1–m3 (1); right dn. with m2 (1); right dn. without teeth (2); left dn. with m1–m3 (2); left dn. with m2 (2); left dn. without teeth (1); right mx. with M1–M3 (3); right mx. with M2–M3 (1); right mx. with M2 (1); right mx. with M3 (1); left mx. with M1–M3 (1); left mx. with M1–M2 (1); left mx. with M1 (1); 710-200: right dn. with m1–m3 (1); right dn. with m2–m3 (1); right dn. without teeth (2); left dn. without teeth (5); right mx. with M1–M3 (1); right mx. with M2–M3 (2); right mx. with M1 (1); right mx. with M2 (1); left mx. with M1 (1); left mx. with M2 (1); 711-200: right dn. with m1–m3 (2); right dn. with m3 (1); right dn. without teeth (3); left dn. with m2 (1); left dn. without teeth (3); right mx. with M1–M3 (2); right mx. with M2–M3 (1); right mx. with M3 (1); left mx. with M1–M3 (1); 712-201: right dn. with m1–m2 (1); right dn. with m2–m3 (5); right dn. without teeth (3); left dn. with m1–m3 (1); left dn. with m1–m2 (1); left dn. with m2 (1); left dn. with m3 (2); left dn. without teeth (4); right mx. with M1–M3 (3); right mx. with M1–M2 (1); right mx. with M1 (1); right mx. with M2 (1); right mx. with M3 (1); left mx. with M1–M3 (2); left mx. with M1 and M3 (1); left mx. with M2–M3 (2); left mx. with M1 (1); left mx. with M3 (1); 713-200: right dn. with m1–m3 (1); right dn. with m2–m3 (1); right dn. with m2 (3); right dn. without teeth (7); left dn. with m2–m3 (1); left dn. with m2 (1); left dn. without teeth (1); right mx. with M2 (1); right mx. with M3 (1); left mx. with M1 and M3 (1); left mx. with M2–M3 (4); left mx. with M2 (3); 714-201: right dn. with m1–m3 (1); right dn. with m1 and m3 (1); right dn. with m2–m3 (1); right dn. without teeth (4); left dn. with m1–m3 (1); left dn. with m1–m2 (1); right mx. with M1–M3 (2); right mx. with M2–M3 (3); right mx. with M3 (1); left mx. with M1–M3 (1); left mx. with M1–M2 (1); left mx. with M2 (1); left mx. with M3 (1); left mx. without teeth (1); 715-204: right dn. with m1–m3 (1); right dn. without teeth (1); left dn. with m1 (1); left dn. without teeth (1); right mx. with M1–M3 (1); right mx. with M2–M3 (2); right mx. with M1 (1); right mx. with M2 (1); right mx. with M3 (1); left mx. with M2 (1); left mx. with M3 (3); 716-202: right dn. with m1 and m3 (1); right dn. with m2–m3 (1); right dn. without teeth (4); left dn. with m1–m3 (1); left dn. with m1–m2 (2); left dn. with m2 (1); left dn. with m3 (1); left dn. without teeth (2); right mx. with M1–M3 (4); right mx. with M1–M2 (2); right mx. with M2–M3 (4); right mx. with M2 (3); left mx. with M1–M3 (1); left mx. with M1 and M3 (1); left mx. with M2–M3 (1); left mx. with M1 (3).

***Sooretamys angouya*.** 682-206: left dn. with m1 and m3 (1); 686-202: right dn. with m1 (1); 688-208: left dn. with m1–m3 (1); 710-213: right dn. with m3 (1); left dn. with m3 (1); left dn. without teeth (1); 712-205: right dn. without teeth (1); left dn. without teeth (1); 713-210: right mx. with M2–M3 (1); 714-213: left dn. without teeth (1); 715-213: right dn. without teeth (1); left dn. with m3 (1); left dn. without teeth (1); 716-204: left dn. without teeth (1).

***Calomys* sp.** 666-202: right dn. with m1–m2 (1); 682-208: right dn. with m1–m3 (1); right dn. with m1 (1); right mx. with M1–M3 (1); right mx. with M1–M2 (1); left mx. with M1–M3 (1); left mx. with M1–M2 (1); left mx. with M1 (1); 683-205: left dn. with m1–m3 (1); left dn. with m1 (1); 684-202: right dn. with m2 (1); 685-204: right dn. with m1 (1); left dn. with m1–m2 (1); left mx. with M1–M2 (2); left mx. with M1 (1); 686-205: right dn. with m1 (1); right dn. with m2 (1); left dn. with m1–m2 (1); right mx. with M1–M2 (1); left mx. with M1–M3 (1); 687-202: right dn. with m1 (2); right dn. without teeth (1); left dn. without teeth (1); left mx. with M1–M3 (1); 688-201: left dn. with m1–m2 (2); left dn. with m1 (1); right mx. with M1–M2 (1); left mx. with M1–M2 (1); 689-204: right dn. with m2 (1); 690-202: left dn. with m1–m2 (2); 691-203: right dn. without teeth (1); right mx. with M1–M2 (1); right mx. without teeth (1); 710-210: left dn. with m1 (1); right mx. with M1–M2 (1); right mx. with M2 (1); left mx. with M1 (1); 711-206: right dn. with m1–m2 (1); left dn. with m1 (1); right mx. with M1–M3 (1); left mx. with M1–M2 (1); 712-208: right dn. with m1–m2 (1); right mx. with M1–M2 (1); right mx. with M1 (3); left mx. with M1–M2 (1); left mx. with M1 (2); 713-205: left mx. with M1–M2 (1); left mx. with M1 (1); 714-208: right dn. with m1–m2 (1); right dn. with m1 (2); right mx. with M1 (1); left mx. with M1 (2); 715-206: right dn. with m1 and m3 (1); right dn. with m1 (1); left dn. with m1 (1); left dn. with m2 (1); right mx. with M1 (1); left mx. with M1 (1); left mx. with M2 (1); 716-206: right dn. with m1–m3 (1); right dn. with m1 (3); right dn. without teeth (1); left dn. with m1–m3 (3); left dn. with m1–m2 (2); left dn. with m1 (1); left dn. without teeth (1); right mx. with M1–M2 (1); right mx. with M2–M3 (1); right mx. with M1 (1); left mx. with M1–M3 (1); left mx. with M1–M2 (1).

***Reithrodon* cf *R*. *typicus*.** 664-200: right dn. with m1–m2 (1).

***Wilfredomys oenax*.** 682-214: left mx. with M2 (1); 689-212: left mx. with m3 (1); 710-204: left mx. with M2 (1); 715-207: right mx. with M2 (1); left mx. with M1–M3 (1); 716-205: left dn. with m2–m3 (1); right mx. with M1 (1).
